# Supplementary material for: Anchored atomic tungsten on a B40 cage: a highly active and selective single-atom catalyst for nitrogen reduction
Source: Royal Society of Chemistry journal article supplement (doi:10.1039/d0cp06178f), 2020-12-29
Supplement: d0cp06178f1.pdf [file d0cp06178f1.pdf]

Electronic Supplementary Information

## **Anchored Atomic Tungsten on B<sub>40</sub> Cage: a Highly Active and Selective Single-Atom Catalyst for Nitrogen Reduction**

Wen-Ying Li,<sup>a</sup> Yi-Bing Sun,<sup>a</sup> Meng-Yang Li,<sup>b</sup> Xiao-Yu Zhang,<sup>a</sup> Xiang Zhao,<sup>\*b</sup> and  
Jing-Shuang Dang<sup>\*a</sup>

<sup>a</sup>*Key Laboratory for Macromolecular Science of Shaanxi Province, School of Chemistry and Chemical Engineering, Shaanxi Normal University, Xi'an 710119 (China)*

<sup>b</sup>*Institute of Chemical Physics, School of Chemistry, Xi'an Jiaotong University, Xi'an 710049 (China)*

**Table S1.** Calculated relative energies of B<sub>40</sub>M in different spin states at the (U)PBE0-D3/LanL2DZ~6-31G(d) level.

| M of B <sub>40</sub> M | Relative energy/eV ( <S <sup>2</sup> >) |                    |                    |                    |                    |
|------------------------|-----------------------------------------|--------------------|--------------------|--------------------|--------------------|
|                        | singlet                                 | doublet            | triplet            | quartet            | quintet            |
| Sc (hep <sup>a</sup> ) |                                         | <b>0.00 (0.77)</b> |                    | 0.64 (3.78)        |                    |
| Sc (hex <sup>a</sup> ) |                                         | 0.60 (0.77)        |                    | 1.28 (3.78)        |                    |
| Ti (hep)               | 0.12                                    |                    | <b>0.00 (2.04)</b> |                    | 0.81 (6.06)        |
| Ti (hex)               | 0.62                                    |                    | 0.84 (2.10)        |                    | 1.68 (6.06)        |
| V (hep)                |                                         | 0.55 (0.86)        |                    | <b>0.00 (3.82)</b> |                    |
| V (hex)                |                                         | 1.17 (1.62)        |                    | 0.73 (4.19)        |                    |
| Cr (hep)               | 1.86                                    |                    | 0.95 (3.01)        |                    | <b>0.00 (6.25)</b> |
| Cr (hex)               | 2.52                                    |                    | 1.64 (2.74)        |                    | 0.58 (6.68)        |
| Mn (hep)               |                                         | 1.33 (0.82)        |                    | <b>0.00 (4.14)</b> |                    |
| Mn (hex)               |                                         | 2.14 (0.97)        |                    | 0.64 (4.59)        |                    |
| Fe (hep)               | 0.88                                    |                    | <b>0.00 (2.74)</b> |                    | 0.30 (6.09)        |
| Fe (hex)               | 1.88                                    |                    | 0.47 (2.35)        |                    | 0.65 (6.06)        |
| Co (hep)               |                                         | <b>0.00 (0.80)</b> |                    | 1.27 (3.80)        |                    |
| Co (hex)               |                                         | 0.88 (0.84)        |                    | 1.17 (3.79)        |                    |
| Ni (hep)               | <b>0.00</b>                             |                    | 1.39 (2.03)        |                    | 3.24 (6.07)        |
| Ni (hex)               | 0.82                                    |                    | 1.79 (2.02)        |                    | 3.70 (6.06)        |
| Cu (hep)               |                                         | <b>0.00 (0.76)</b> |                    | 1.91/3.80          |                    |
| Cu (hex)               |                                         | 0.34 (0.76)        |                    | 2.26/3.80          |                    |
| Mo (hep)               | <b>0.00</b>                             |                    | 0.01 (2.09)        |                    | 0.06 (6.07)        |
| Mo (hex)               | 0.43                                    |                    | 0.61 (2.08)        |                    | 1.03 (6.08)        |
| W (hep)                | 0.09                                    | □                  | <b>0.00 (2.03)</b> | □                  | 0.08 (6.06)        |
| W (hex)                | 0.68                                    |                    | 0.91 (2.09)        |                    | 1.29 (6.06)        |
| Pd (hep)               | <b>0.00</b>                             |                    | 1.66 (2.03)        |                    | 3.42 (6.05)        |
| Pd (hex)               | 0.58                                    |                    | 1.93 (2.01)        |                    | 3.82 (6.04)        |
| Pt (hep)               | <b>0.00</b>                             |                    | 1.51 (2.03)        |                    | 3.22 (6.05)        |
| Pt (hex)               | 0.76                                    |                    | 2.04 (2.02)        |                    | 3.79 (6.04)        |
| Ru (hep)               | 0.07                                    |                    | <b>0.00 (2.04)</b> |                    | 1.21 (6.05)        |
| Ru (hex)               | 0.57                                    |                    | 0.41 (2.03)        |                    | 2.07 (6.05)        |
| Rh (hep)               |                                         | <b>0.00 (0.77)</b> |                    | 1.48 (3.78)        |                    |
| Rh (hex)               |                                         | 0.54 (0.76)        | □                  | 1.79 (3.78)        | □                  |

<sup>a</sup>: M(hep)/(hex) indicates the metal M resides in the center of a heptagonal/hexagonal ring of B<sub>40</sub>.

**Table S2.** Calculated electronic energies of metal ( $E(M)$ ),  $B_{40}$  ( $E(B_{40})$ ), metalloborospherene ( $E(B_{40}M)$ ), and the corresponding binding energies ( $E_b$ ) of different atomic metals on  $B_{40}$  at the (U)PBE0-D3/LanL2DZ~6-31G(d) level.

| M  | $E(M)$ (a.u.) | $E(B_{40})$ (a.u.) | $E(B_{40}M)$ (a.u.) | $E_b$ (eV) |
|----|---------------|--------------------|---------------------|------------|
| Sc | -46.3264      | -992.5674          | -1039.0432          | 4.07       |
| Ti | -57.8614      | -992.5674          | -1050.6455          | 5.90       |
| V  | -71.1709      | -992.5674          | -1063.8788          | 3.82       |
| Cr | -86.1972      | -992.5674          | -1078.8674          | 2.80       |
| Mn | -103.6889     | -992.5674          | -1096.4699          | 5.81       |
| Fe | -123.3017     | -992.5674          | -1115.9756          | 2.90       |
| Co | -144.9499     | -992.5674          | -1137.6349          | 3.20       |
| Ni | -169.1733     | -992.5674          | -1161.8812          | 3.82       |
| Cu | -196.0389     | -992.5674          | -1188.6728          | 1.81       |
| Mo | -67.3620      | -992.5674          | -1060.0873          | 4.30       |
| W  | -67.5996      | -992.5674          | -1060.3513          | 5.01       |
| Pd | -126.6666     | -992.5674          | -1119.3437          | 2.99       |
| Pt | -119.0371     | -992.5674          | -1111.7675          | 4.43       |
| Ru | -93.7601      | -992.5674          | -1086.4787          | 4.12       |
| Rh | -109.4003     | -992.5674          | -1102.1187          | 4.11       |

**Table S3.** Calculated NPA charge of  $B_{40}W$  and  $N_2$  fragments of  $B_{40}W-N_2$  at the (U)PBE0-D3/LanL2DZ~6-311G(d,p)/(U)PBE0-D3/LanL2DZ~6-31G(d) level.

|                               | NPA charge (e) |       |
|-------------------------------|----------------|-------|
|                               | $B_{40}W$      | $N_2$ |
| $B_{40}W-N_{2\text{side-on}}$ | 0.25           | -0.14 |
| $B_{40}W-N_{2\text{end-on}}$  | -0.04          | 0.04  |

**Table S4.** Calculated electronic energy ( $E.E.$ ) at the (U)PBE0-D3/LanL2DZ~6-311G(d,p)/(U)PBE0-D3/LanL2DZ~6-31G(d) level, thermal correction ( $T.C.$ ) at the (U)PBE0-D3/LanL2DZ~6-31G(d) level, and the corresponding Gibbs free energy ( $G$ ) of the selected  $*N_2$  and  $*NNH$  intermediates along the NRR process.

| M                    | $E.E.$ (a.u.) | $*N_2$        |            | $*NNH$        |               |            |
|----------------------|---------------|---------------|------------|---------------|---------------|------------|
|                      |               | $T.C.$ (a.u.) | $G$ (a.u.) | $E.E.$ (a.u.) | $T.C.$ (a.u.) | $G$ (a.u.) |
| Sc_end <sup>a</sup>  | -1148.6401    | 0.1349        | -1148.5052 | -1149.1905    | 0.1444        | -1149.0461 |
| Ti_side <sup>a</sup> | -1160.2497    | 0.1378        | -1160.1119 | -1160.8308    | 0.1485        | -1160.6823 |
| Ti_end               | -1160.2580    | 0.1353        | -1160.1227 | -1160.8107    | 0.1460        | -1160.6646 |
| V_end                | -1173.4888    | 0.1353        | -1173.3535 | -1174.0391    | 0.1496        | -1173.8895 |
| Cr_end               | -1188.4671    | 0.1333        | -1188.3338 | -1189.0044    | 0.1437        | -1188.8607 |
| Mn_end               | -1206.0717    | 0.1329        | -1205.9388 | -1206.6121    | 0.1452        | -1206.4668 |
| Fe_end               | -1225.5870    | 0.1357        | -1225.4513 | -1226.1240    | 0.1462        | -1225.9777 |
| Co_end               | -1247.2350    | 0.1370        | -1247.0980 | -1247.7543    | 0.1499        | -1247.6044 |
| Cu_end               | -1298.2642    | 0.1308        | -1298.1335 | -1298.7815    | 0.1449        | -1298.6366 |
| Mo_side              | -1169.6856    | 0.1376        | -1169.5480 | -1170.2591    | 0.1460        | -1170.1130 |
| Mo_end               | -1169.7065    | 0.1369        | -1169.5696 | -1170.2631    | 0.1470        | -1170.1160 |
| W_side               | -1169.9615    | 0.1354        | -1169.8260 | -1170.5492    | 0.1460        | -1170.4032 |
| W_end                | -1169.9810    | 0.1354        | -1169.8456 | -1170.5464    | 0.1449        | -1170.4015 |
| Ru_end               | -1196.0614    | 0.1350        | -1195.9264 | -1196.6192    | 0.1457        | -1196.4735 |

<sup>a</sup>: end/side indicates the  $N_2$  is adsorbed in the form of end-on/side-on configuration.

**Table S5.** Calculated electronic energy ( $E.E.$ ) at the (U)PBE0-D3/LanL2DZ~6-311G(d,p)/(U)PBE0-D3/LanL2DZ~6-31G(d) level, thermal correction ( $T.C.$ ) at the (U)PBE0-D3/LanL2DZ~6-31G(d) level, and the corresponding Gibbs free energy ( $G$ ) of the selected  $*NH_2$  and  $*NH_3$  intermediates along the NRR process.

| M  | $E.E.$ (a.u.)  | $*NH_2$       |                | $*NH_3$        |               |                |
|----|----------------|---------------|----------------|----------------|---------------|----------------|
|    |                | $T.C.$ (a.u.) | $G$ (a.u.)     | $E.E.$ (a.u.)  | $T.C.$ (a.u.) | $G$ (a.u.)     |
| Ti | -<br>1106.7695 | 0.1538        | -<br>1106.6157 | -<br>1107.3615 | 0.1639        | -<br>1107.1976 |
| Mo | -<br>1116.1967 | 0.1536        | -<br>1116.0431 | -<br>1116.7960 | 0.1651        | -<br>1116.6309 |
| W  | -<br>1116.4928 | 0.1520        | -<br>1116.3408 | -<br>1117.0694 | 0.1646        | -<br>1116.9048 |



**Table S6.** Calculated electronic energy ( $E.E.$ ) at the (U)PBE0-D3/LanL2DZ~6-311G(d,p)/(U)PBE0-D3/LanL2DZ~6-31G(d) level, thermal correction ( $T.C.$ ) at the (U)PBE0-D3/LanL2DZ~6-31G(d) level, and the corresponding Gibbs free energy ( $G$ ) of the selected  $B_{40}M$  and  $*H$  intermediates along the HER process.

| M  | $E.E.$ (a.u.) | $B_{40}M$     |            | $*H$          |               |            |
|----|---------------|---------------|------------|---------------|---------------|------------|
|    |               | $T.C.$ (a.u.) | $G$ (a.u.) | $E.E.$ (a.u.) | $T.C.$ (a.u.) | $G$ (a.u.) |
| Ti | -1050.7944    | 0.1313        | -1050.6631 | -1051.3881    | 0.1368        | -1051.2512 |
| Mo | -1060.2360    | 0.1312        | -1060.1048 | -1060.8240    | 0.1340        | -1060.6900 |
| W  | -1060.4836    | 0.1274        | -1060.3562 | -1061.1132    | 0.1339        | -1060.9793 |

**Table S7.** Calculated electronic energy ( $E.E.$ ) at the (U)PBE0-D3/LanL2DZ~6-311G(d,p)/(U)PBE0-D3/LanL2DZ~6-31G(d) level, thermal correction ( $T.C.$ ) at the (U)PBE0-D3/LanL2DZ~6-31G(d) level, and the corresponding Gibbs free energy ( $G$ ) of all relevant structures along the NRR process.

| Relevant structure along the NRR | $E.E.$ (a.u.) | $T.C.$ (a.u.) | $G$ (a.u.) |
|----------------------------------|---------------|---------------|------------|
| $N_2$                            | -109.4289     | -0.0128       | -109.4417  |
| $H_2$                            | -1.1682       | -0.0014       | -1.1695    |
| $NH_3$                           | -56.5038      | 0.0159        | -56.4880   |
| $B_{40}W$                        | -1060.4836    | 0.1274        | -1060.3562 |
| $*N_{2side}$                     | -1169.9615    | 0.1354        | -1169.8260 |
| $*NNH_{side}$                    | -1170.5492    | 0.1460        | -1170.4032 |
| $*NHNH_{side}$                   | -1171.1613    | 0.1594        | -1171.0019 |
| $*NHNH_{2side}$                  | -1171.7866    | 0.1713        | -1171.6153 |
| $*N_2H_{4side}$                  | -1172.3476    | 0.1835        | -1172.1641 |
| $*N$                             | -1115.2490    | 0.1325        | -1115.1165 |
| $*NH$                            | -1115.8895    | 0.1437        | -1115.7457 |
| $*NH_2$                          | -1116.4928    | 0.1520        | -1116.3408 |
| $*NH_3$                          | -1117.0694    | 0.1646        | -1116.9048 |
| $*N_{2end}$                      | -1169.9810    | 0.1354        | -1169.8456 |
| $*NNH_{end}$                     | -1170.5464    | 0.1449        | -1170.4015 |
| $*NNH_2$                         | -1171.1772    | 0.1590        | -1171.0182 |
| $*NHNH_{end}$                    | -1171.1268    | 0.1577        | -1170.9691 |
| $*NHNH_{2end}$                   | -1171.7602    | 0.1690        | -1171.5912 |

---

\*N<sub>2</sub>H<sub>4</sub>end

-1172.3361

0.1808

-1172.1552

---
